# Supplementary material
Source: PubMed Central journal article supplement (PMC3315443)

**Figure S1.**

Comparison of the molecular mass of recombinant (M1) and native GISP. HEK cell, cultured neuron and brain extracts were resolved on a 5% gel and blotted with GISP antibody. The M1 GISP construct migrates at a slightly larger Mr than native GISP. Note also that minor higher molecular mass bands are detected in brain extract that correspond to the expected sizes of rat AKAP450, AKAP350 and the hypothetical protein product of transcript XM\_347223. See text for details

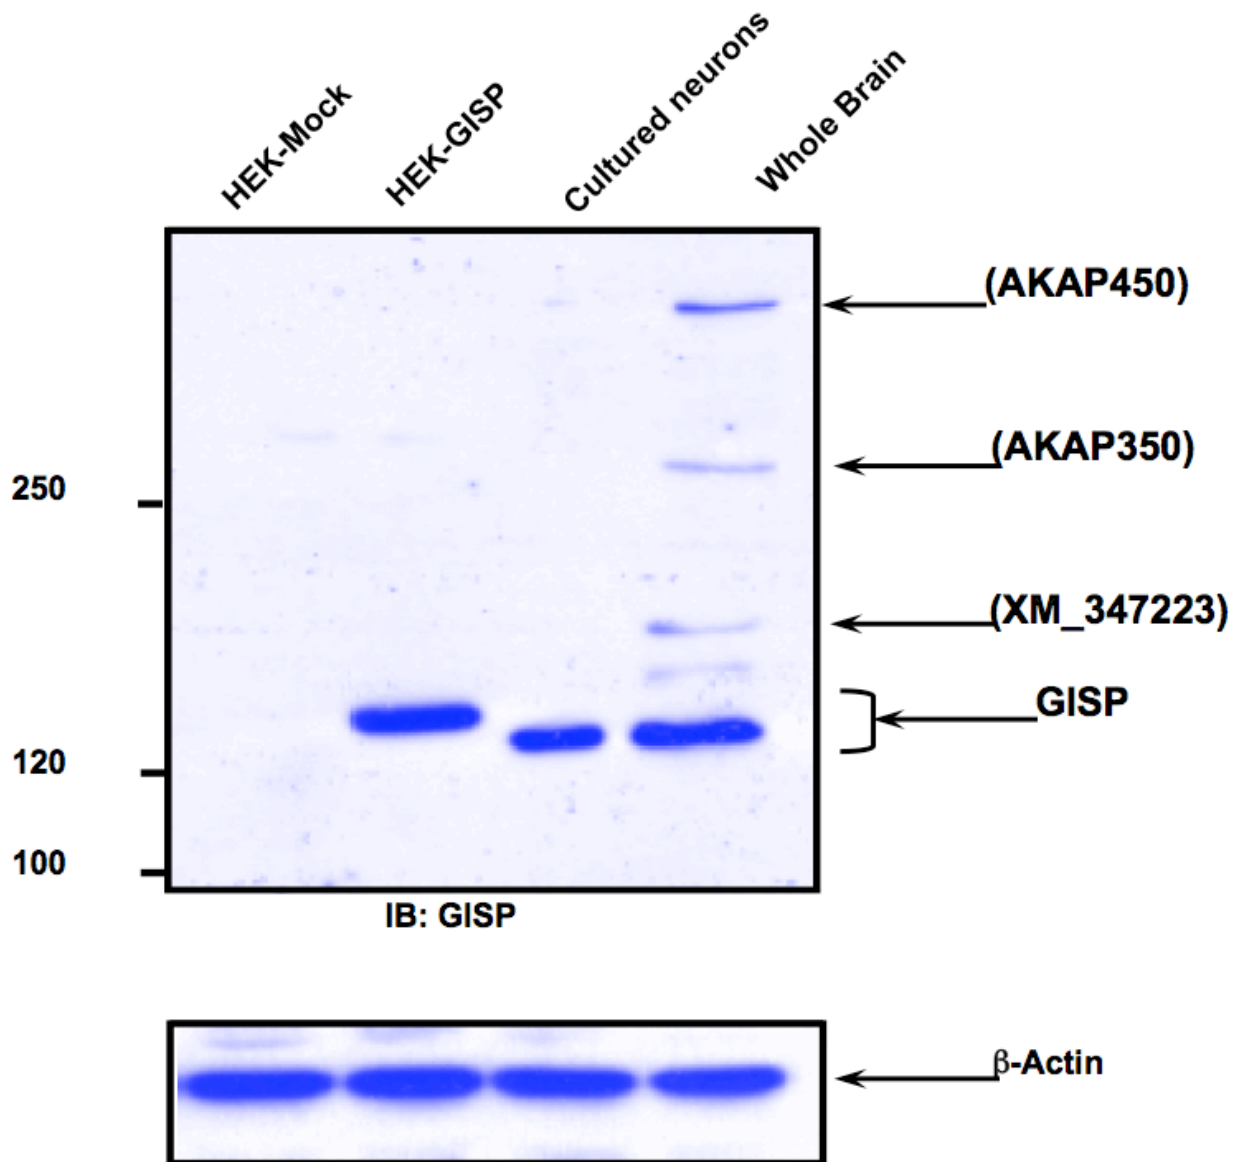

Supplement: NIHMS40411-supplement-Supp_Fig_1.pdf [file NIHMS40411-supplement-Supp_Fig_1.pdf]
